# Supplementary material for: Bi-directional signalling between the intestinal epithelium and type-3 innate lymphoid cells (ILC3) regulates secretory dynamics and IL-22
Source: PubMed Central journal article supplement (PMC7615753; doi:10.1016/j.mucimm.2023.11.002), 2023-11-10
Supplement: EMS194712-supplement-Supplementary_Materials.pdf [file EMS194712-supplement-Supplementary_Materials.pdf]

## **SUPPLEMENTAL FIGURES**

| <b>Species</b>                                | <b>Gene</b>          | <b>Forward primer (5'-3')</b> | <b>Reverse primer (5'-3')</b> |
|-----------------------------------------------|----------------------|-------------------------------|-------------------------------|
| Mouse (used for SYBR green amplification)     | <i>Hprt1</i>         | TGGATACAGGCCAGACTTTGTT        | CAGATTCAACTTGCGCTCATC         |
|                                               | <i>Gapdh</i>         | TGTGTCCGTCGTGGATCTGA          | TTGCTGTTGAAGTCGCAGGAG         |
|                                               | <i>Muc2</i>          | ATGCCACCTCCTCAAAGAC           | GTAGTTTCCGTTGGAACAGTGAA       |
|                                               | <i>Lyz1</i>          | GAGACCGAAGCACCGACTATG         | CGGTTTTGACATTGTGTTTCGC        |
|                                               | <i>Dll1</i>          | TGGCGCAGGCATCGA               | GGCGGCTGATGAGTCTTTCT          |
|                                               | <i>Dll4</i>          | TGTCTCCACGCCGGTATTG           | AGGTCGTCTCCCGGTGTGT           |
|                                               | <i>Reg3g</i>         | ATGCTTCCCCGTATAACCATCA        | ACTTCACCTTGACACTGAGAA         |
|                                               | <i>Atoh1</i>         | AGATCTACATCAACGCTCTGTC        | ACTGGCCTCATCAGAGTCACTG        |
|                                               | <i>Fut2</i>          | ACCTCCAGCAACGAATAGTGA         | GCCGATGGAATTGATCGTGAA         |
| <i>Tff3</i>                                   | TTGCTGGGTCTCTGGGATAG | TACACTGCTCCGATGTGACAG         |                               |
| Mouse (used for TAQ polymerase amplification) | <b>Gene</b>          | <b>Probe identifier</b>       | <b>Source</b>                 |
|                                               | <i>Il22</i>          | Mm01226722                    | ThermoFisher                  |
|                                               | <i>Gapdh</i>         | Mm99999915                    |                               |

**Supplementary table 1.**

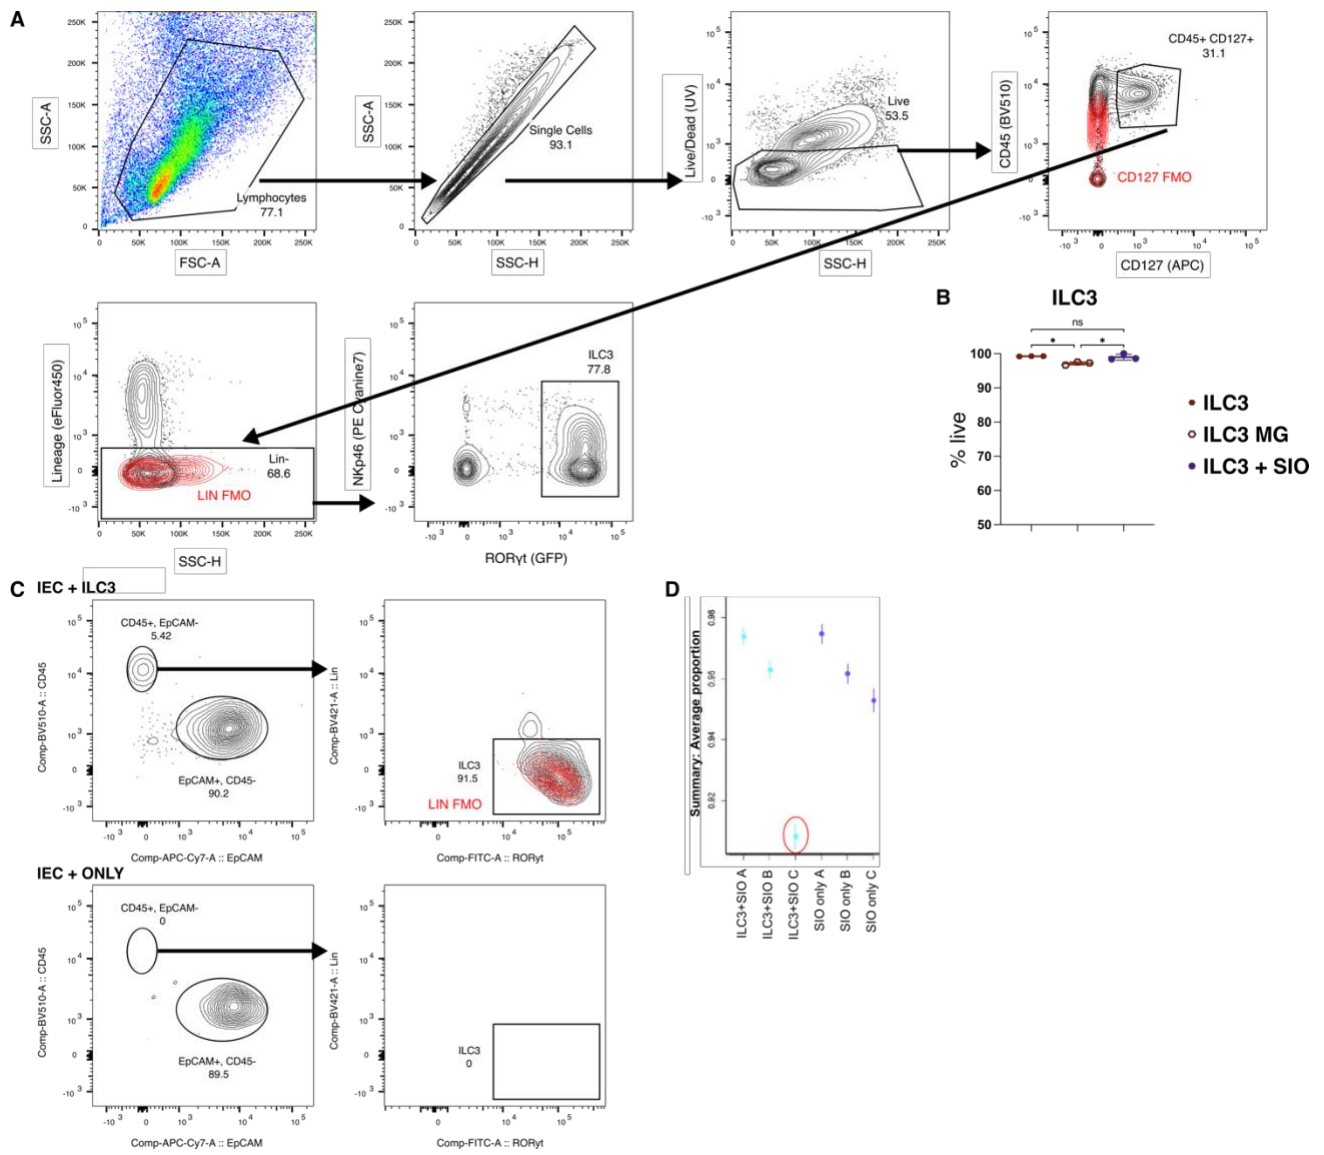

**Supplemental figure 1. ILC3 gating strategy, FACS purification of epithelial cells from co-cultures and RNA sequencing quality control.**

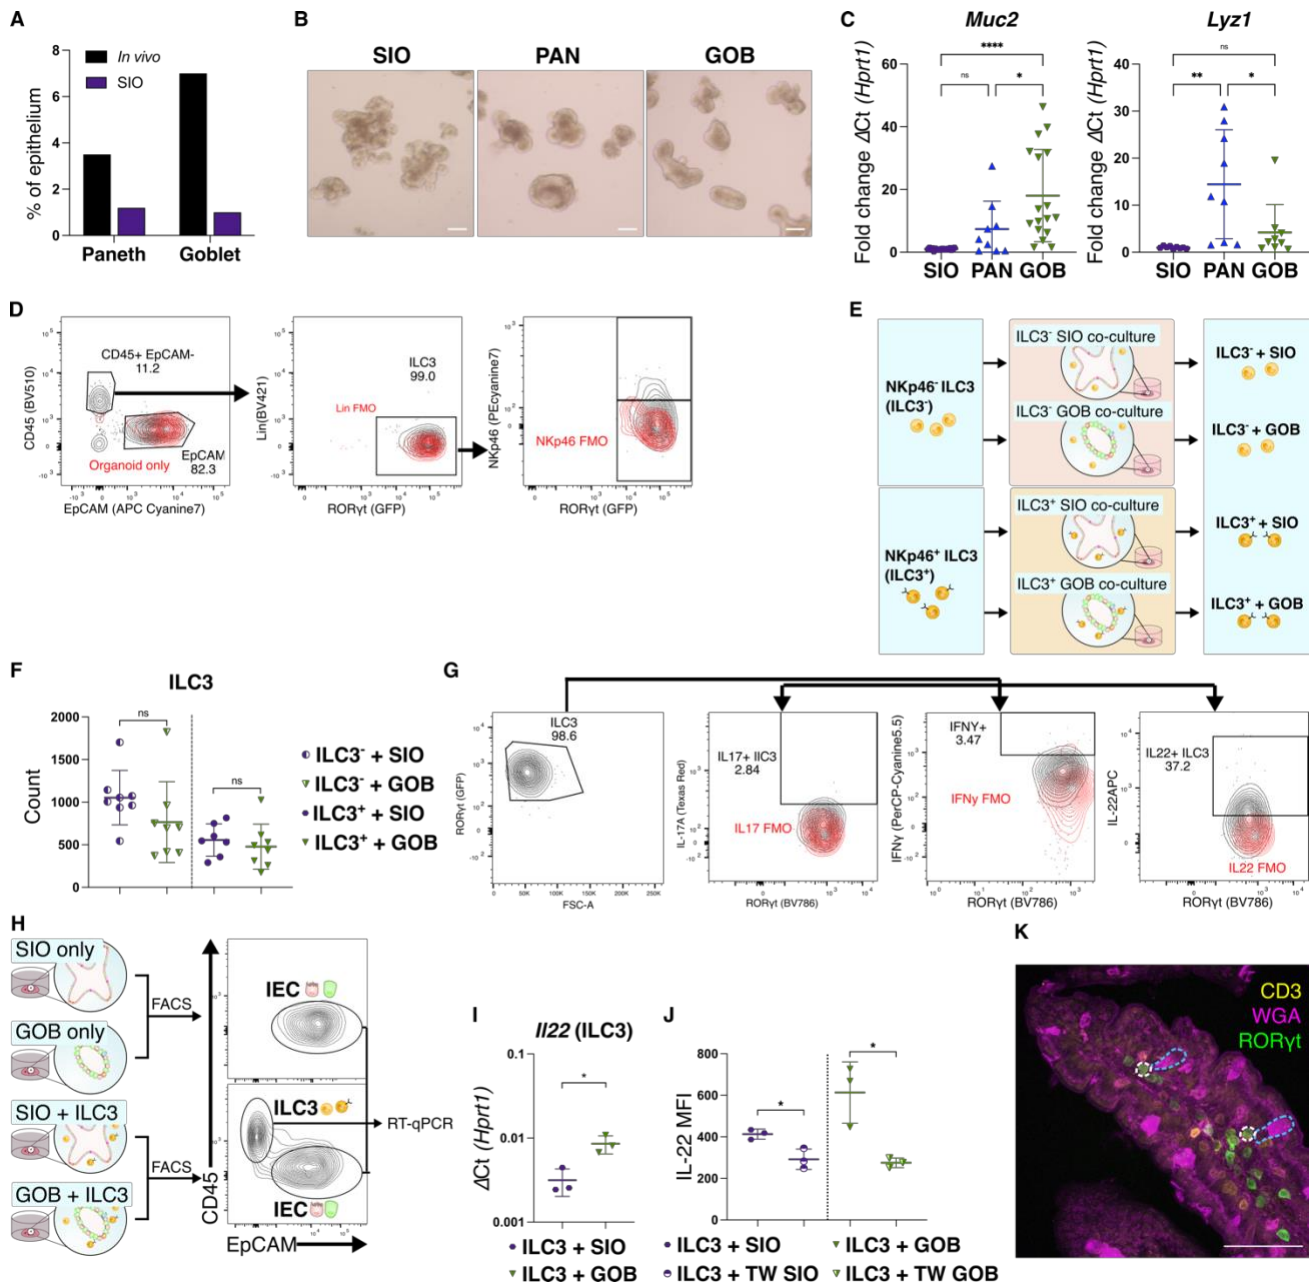

Supplemental figure 2. Goblet and Paneth cell enriched SIO and ILC3 co-culture.

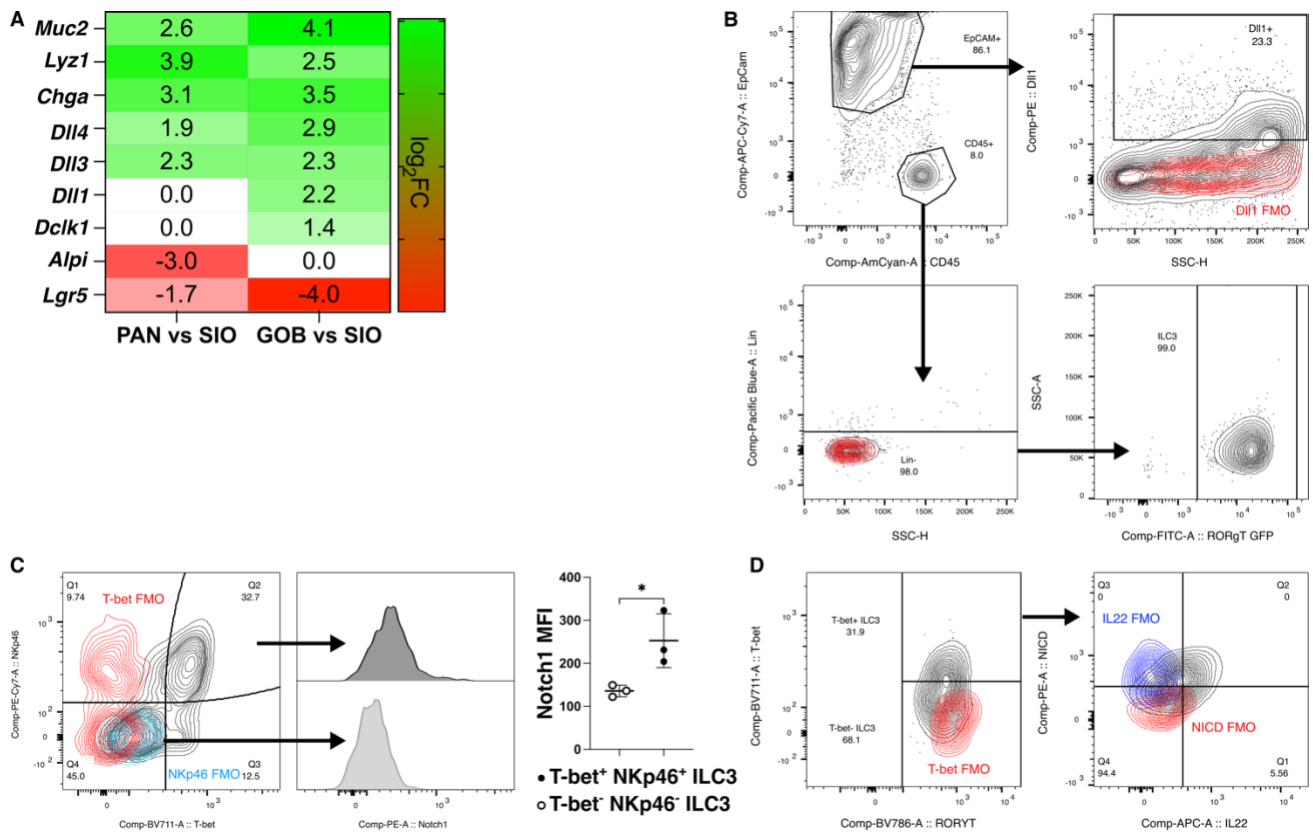

**Supplemental figure 3. Investigation of the Notch pathway in GOB-ILC3 co-cultures.**

**A**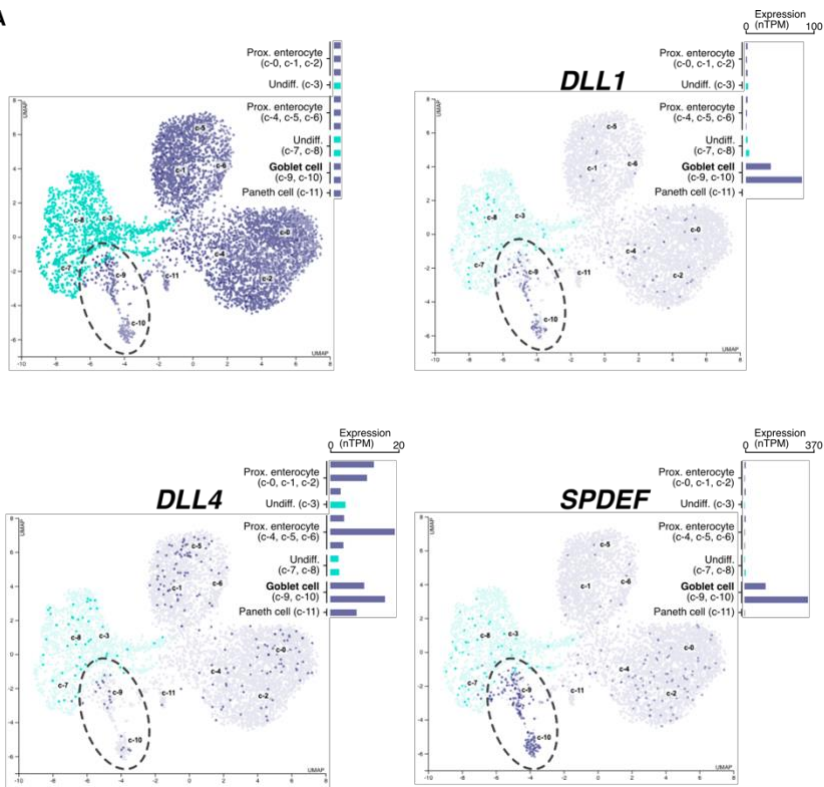**B**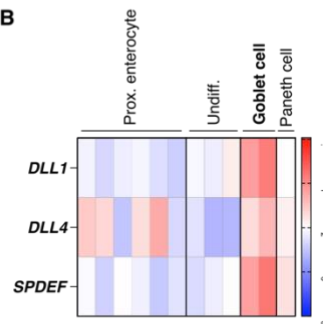

**Supplemental figure 4. Enrichment of *DLL1* in human small intestinal goblet cells.**
